# Supplementary material for: Halogen-bonded cocrystallization of racetam pharmaceuticals and perfluorinated iodobenzenes
Source: Royal Society of Chemistry journal article supplement (doi:10.1039/d5ce00090d), 2025-01-01
Supplement: d5ce00090d1.pdf [file d5ce00090d1.pdf]

## Supporting Information

### Halogen-bonded cocrystallization of racetam pharmaceuticals and perfluorinated iodobenzenes

*Lijie Wei, <sup>a</sup> Chunling Liu, <sup>a</sup> Yiwei Liu, <sup>ab</sup> Xiang Lian <sup>\*ab</sup> and Lixing Song <sup>\*ab</sup>*

<sup>a</sup> School of Chemical and Environmental Engineering, Shanghai Institute of Technology,  
Shanghai 201418, P. R. China

<sup>b</sup> Shanghai Engineering Research Center of Green Fluoropharmaceutical Technology,  
Shanghai 201418, P. R. China

#### \* Corresponding Authors:

Lixing Song; E-mail: slx@sit.edu.cn.

Xiang Lian; E-mail: lianx@sit.edu.cn.

#### Table of Contents

|           |                                  |         |
|-----------|----------------------------------|---------|
| Figure S1 | PXRD pattern of CC1              | Page S2 |
| Figure S2 | PXRD pattern of CC2              | Page S2 |
| Figure S3 | PXRD pattern of CC3              | Page S3 |
| Figure S4 | PXRD pattern of CC4              | Page S3 |
| Table S1  | Halogen bond details for CC1-CC4 | Page S4 |
| Figure S5 | 2D finger plots of CC1           | Page S4 |
| Figure S6 | 2D finger plots of CC2           | Page S5 |
| Figure S7 | 2D finger plots of CC3           | Page S5 |
| Figure S8 | 2D finger plots of CC4           | Page S6 |

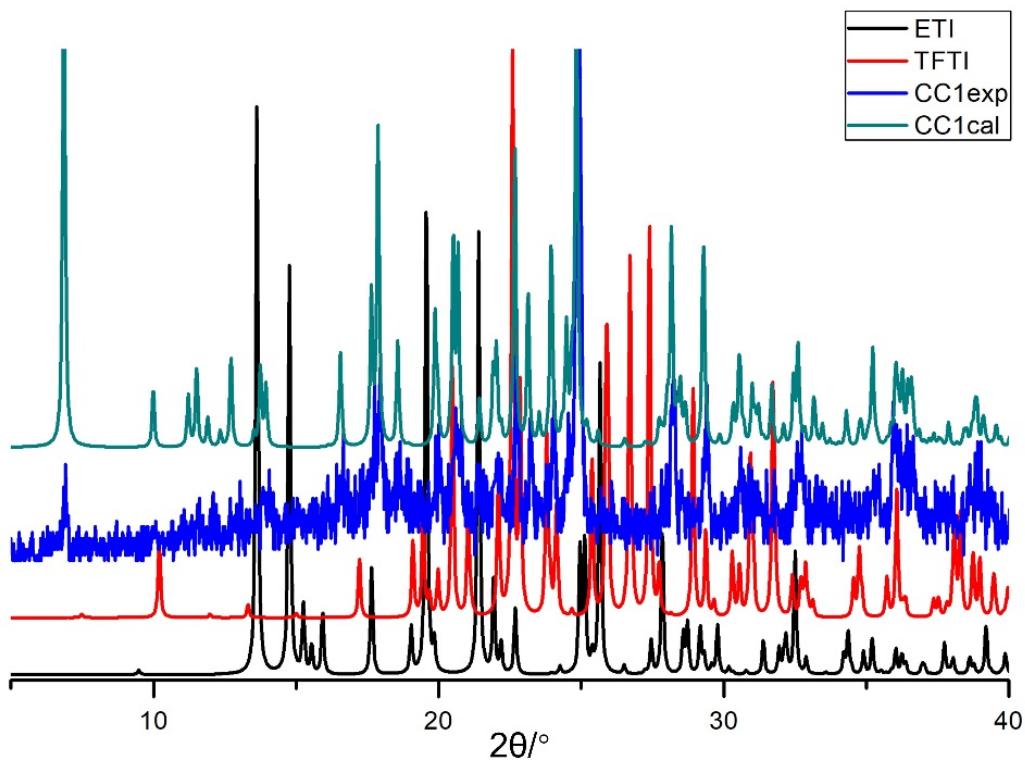

**Figure S1.** PXRD pattern of CC1. Black is ETI, red is TFTI, blue is experimental pattern of CC1 and green is simulated pattern of CC1.

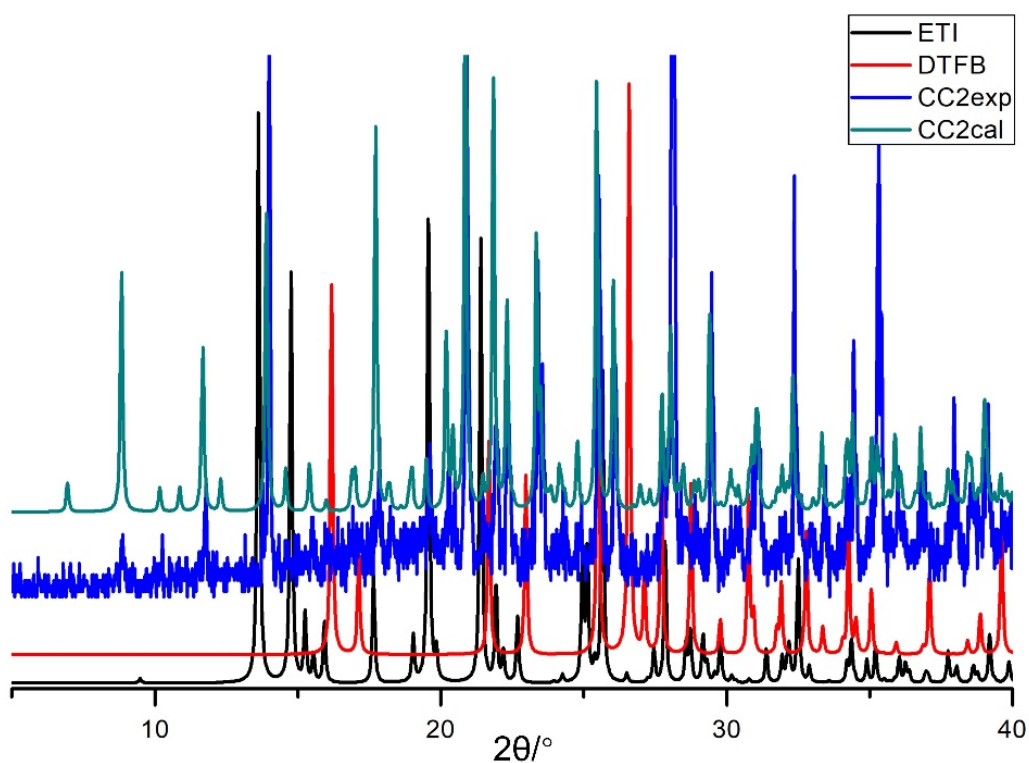

**Figure S2.** PXRD pattern of CC2. Black is ETI, red is DTFB, blue is experimental pattern of CC2 and green is simulated pattern of CC2.

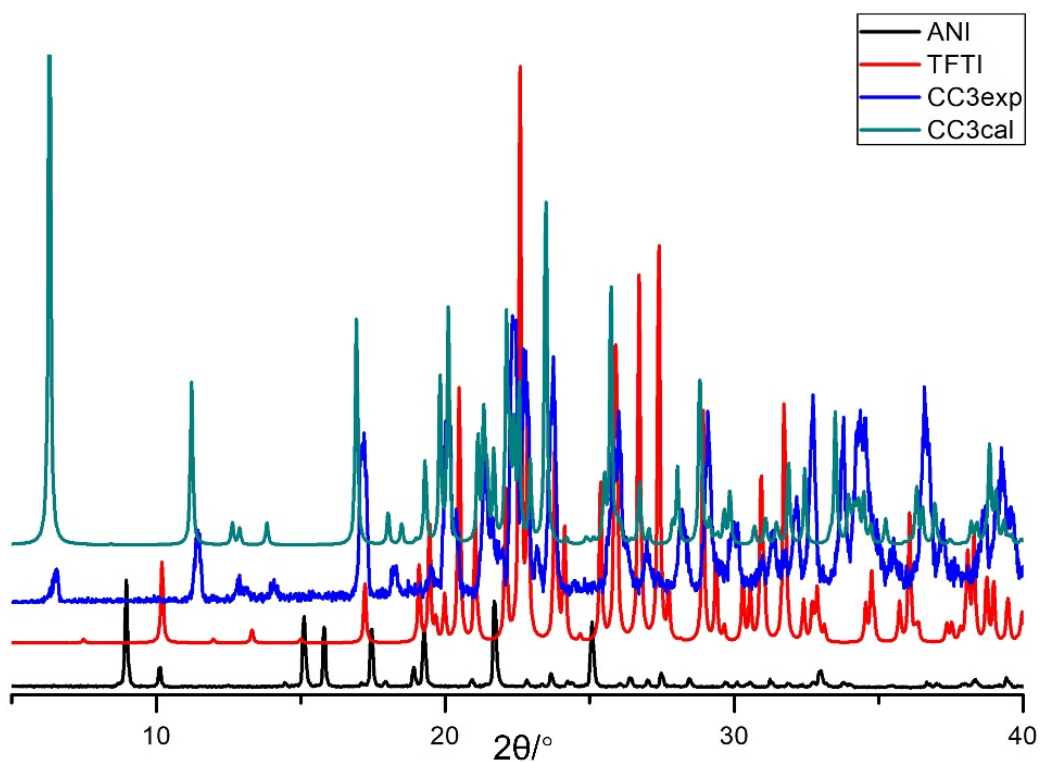

**Figure S3.** PXRD pattern of CC3. Black is ANI, red is TFTI, blue is experimental pattern of CC3 and green is simulated pattern of CC3.

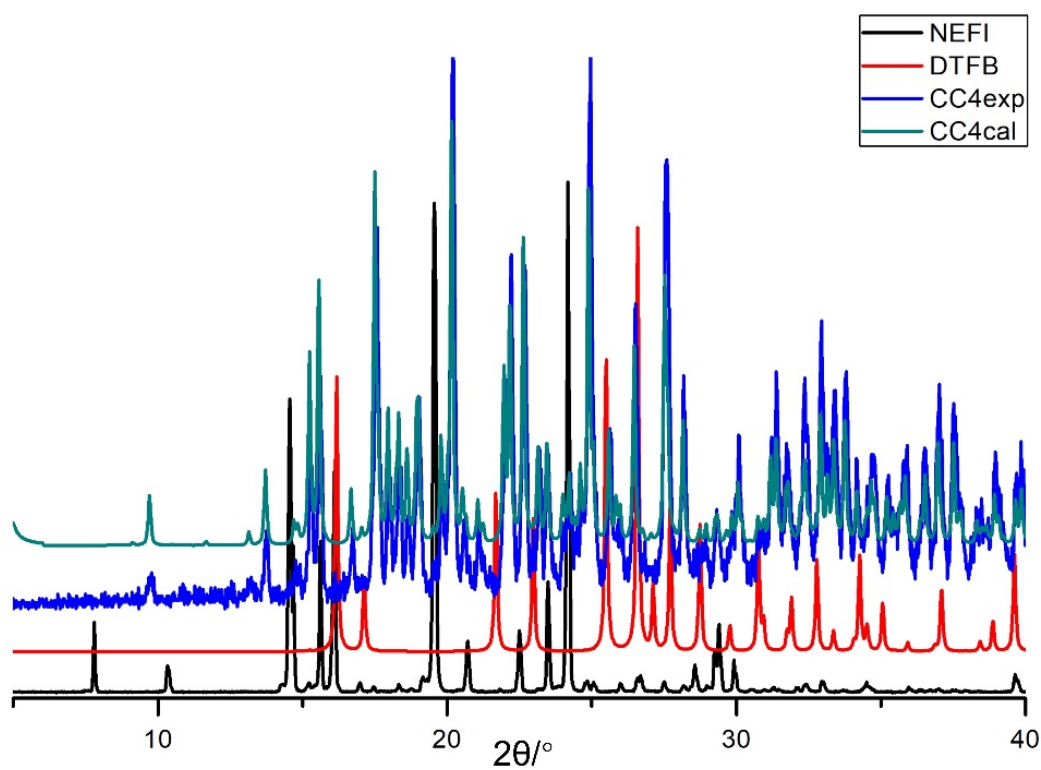

**Figure S4.** PXRD pattern of CC4. Black is NEFI, red is DTFB, blue is experimental pattern of CC4 and green is simulated pattern of CC4.

**Table S1.** Halogen bond details for CC1-CC4.

| cocrystal | D...A       | Acceptor specie             | d(D...A)/ Å | $\angle(\text{C-D}\cdots\text{A})^\circ$ |
|-----------|-------------|-----------------------------|-------------|------------------------------------------|
| 1         | I3...O9     | carbonyl oxygen             | 2.959       | 177.50                                   |
|           | I2...O3     | carbonyl oxygen on the ring | 3.035       | 166.53                                   |
| 2         | I2...O9     | carbonyl oxygen             | 3.043       | 172.80                                   |
|           | I3...O3     | carbonyl oxygen on the ring | 2.924       | 177.71                                   |
| 3         | I1...O8     | carbonyl oxygen             | 2.967       | 173.26                                   |
|           | I2...O3     | carbonyl oxygen on the ring | 2.951       | 173.91                                   |
| 4         | I1...O3     | carbonyl oxygen on the ring | 2.842       | 177.55                                   |
|           | I2... $\pi$ | benzene ring                | 4.231       |                                          |

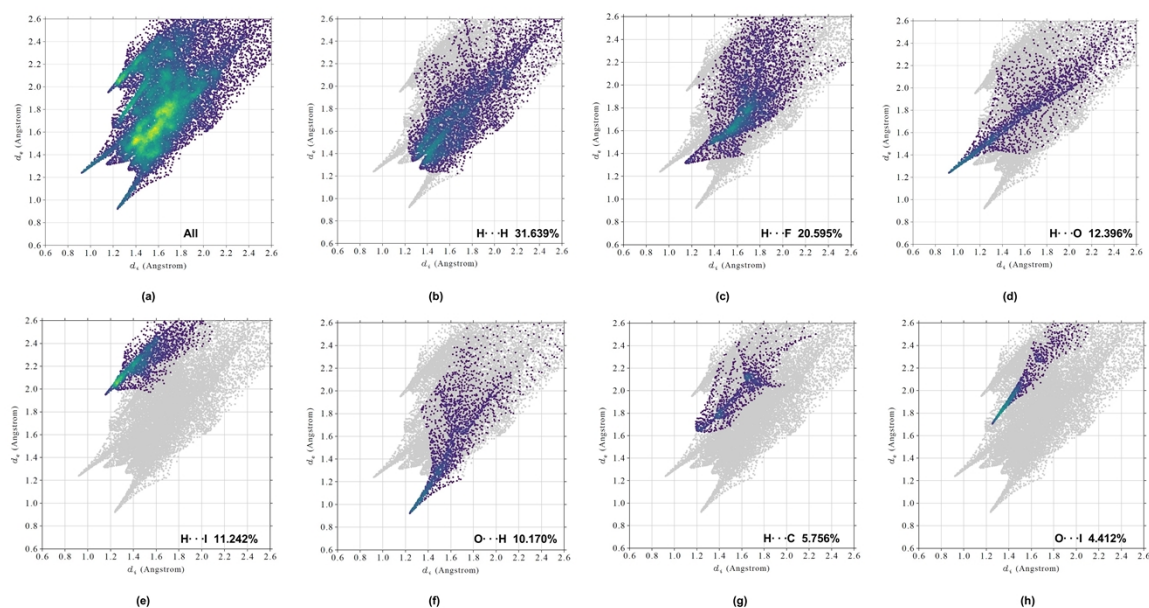**Figure S5.** 2D fingerprint plots of CC1 according to  $d_{\text{norm}}$  value, Hirshfeld surface view about intermolecular interactions, and different features characteristic of some key intermolecular contacts, (a) all, (b) H...H, (c) H...F, (d) H...O, (e) H...I, (f) O...H, (g) H...C and (h) O...I.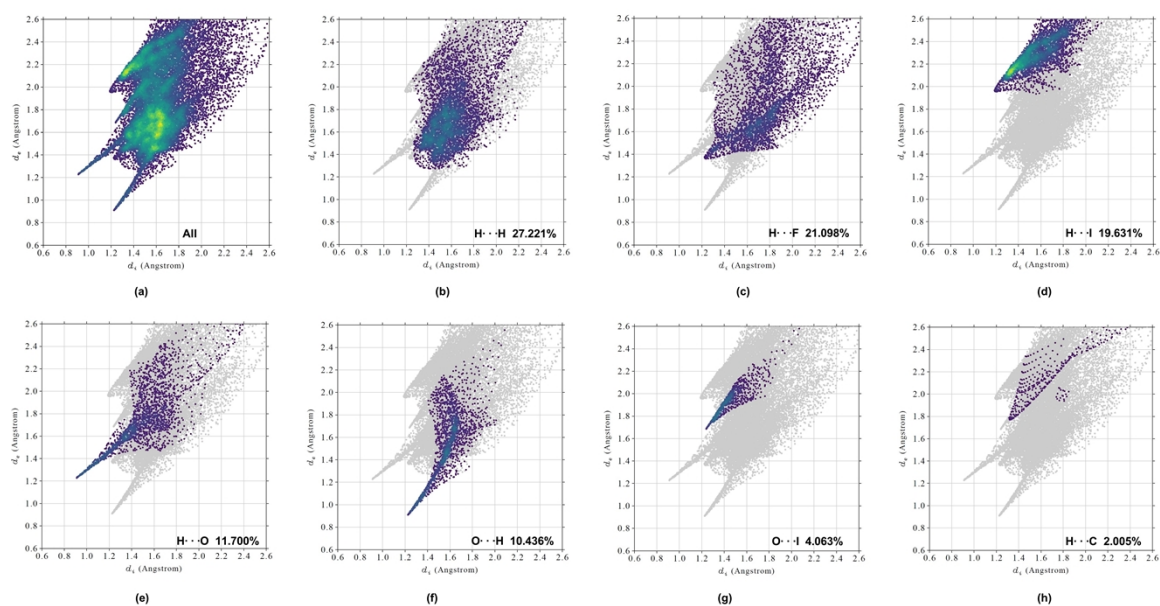

**Figure S6.** 2D fingerprint plots of CC2 according to dnorm value, Hirshfeld surface view about intermolecular interactions, and different features characteristic of some key intermolecular contacts, (a) all, (b) H···H, (c) H···F, (d) H···I, (e) H···O, (f) O···H, (g) O···I and (h) H···C.

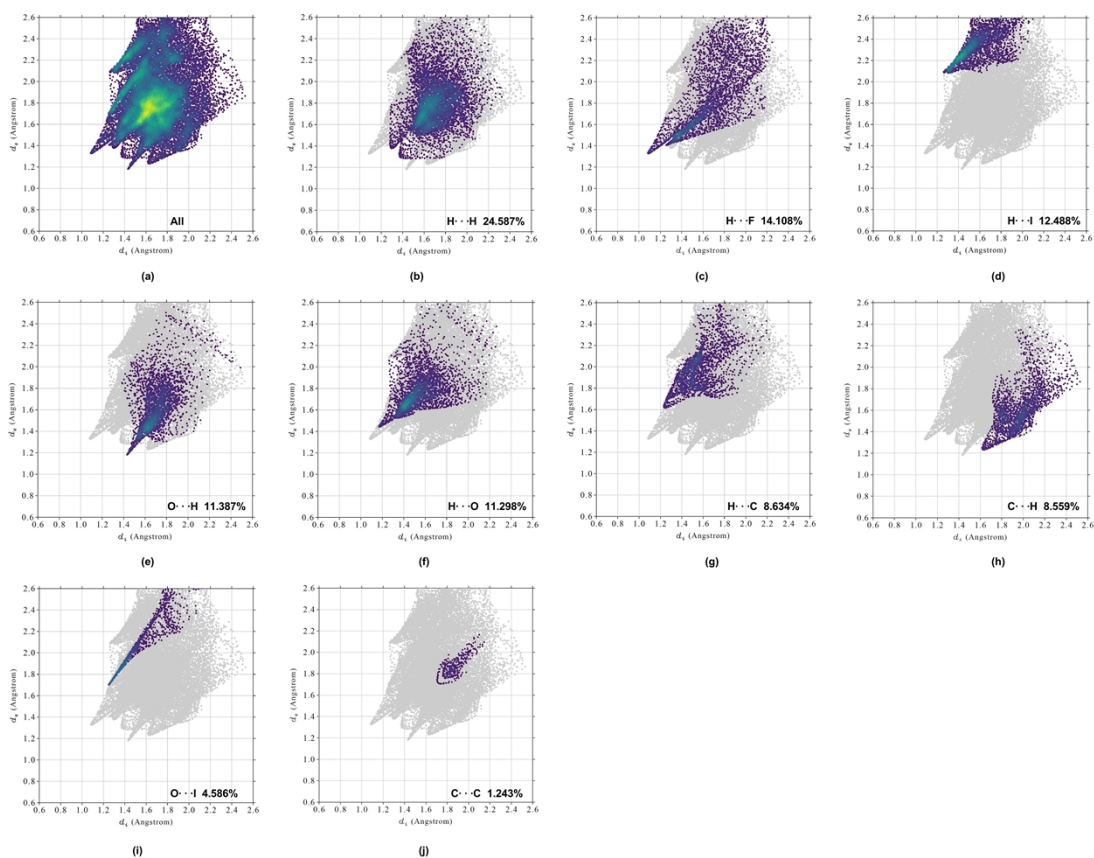

**Figure S7.** 2D fingerprint plots of CC3 according to dnorm value, Hirshfeld surface view about intermolecular interactions, and different features characteristic of some key intermolecular contacts, (a) all, (b) H···H, (c) H···F, (d) H···I, (e) O···H, (f) H···O, (g) H···C, (h) C···H, (i) O···I and (j) C···C.

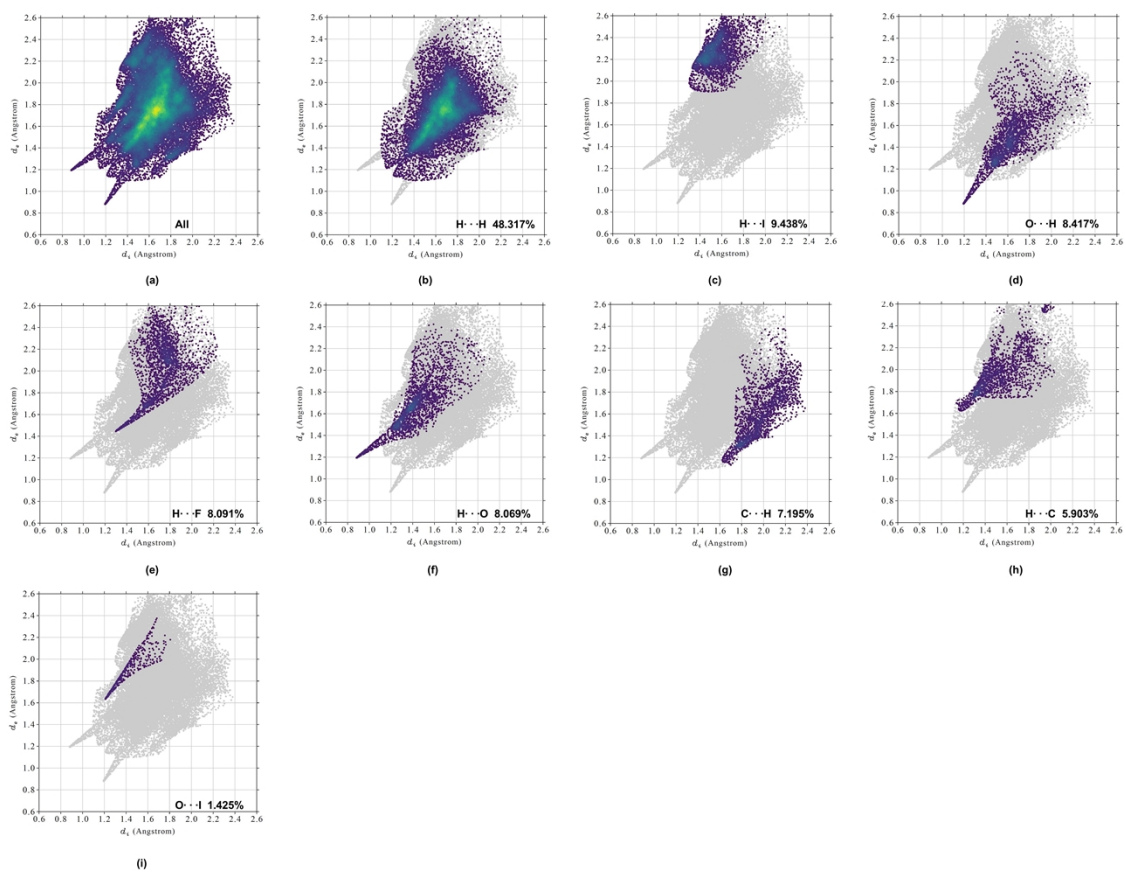

**Figure S8.** 2D fingerprint plots of CC4 according to  $d_{norm}$  value, Hirshfeld surface view about intermolecular interactions, and different features characteristic of some key intermolecular contacts, (a) all, (b)  $H \cdots H$ , (c)  $H \cdots I$ , (d)  $O \cdots H$ , (e)  $H \cdots F$ , (f)  $H \cdots O$ , (g)  $C \cdots H$ , (h)  $H \cdots C$  and (i)  $O \cdots I$ .
